# Supplementary material for: Aberrant accumulation of NIK promotes tumor growth by dysregulating translation and post-translational modifications in breast cancer
Source: PubMed Central journal article supplement (PMC10067241; doi:10.1186/s12935-023-02904-y), 2023-04-01
Supplement: 12935_2023_2904_MOESM2_ESM.pdf [file 12935_2023_2904_MOESM2_ESM.pdf]

**Additional file 2**

**Figure. S 1.**

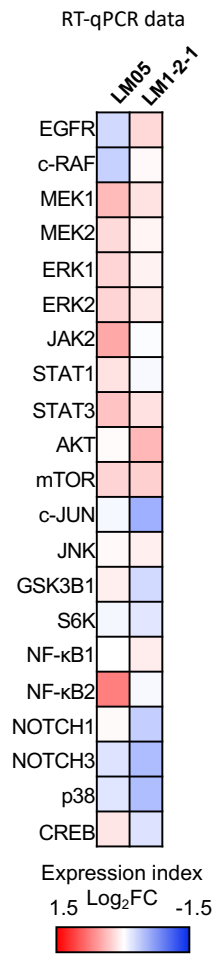

**The validation of the microarray analysis result by RT-qPCR for target genes of the signal analysis.**

These target genes expression of the signal analysis was analyzed by RT-qPCR. The expression results are shown as a heatmap of the log<sub>2</sub>-fold change in each cell compared with the parental cells.

**Figure. S 2.**

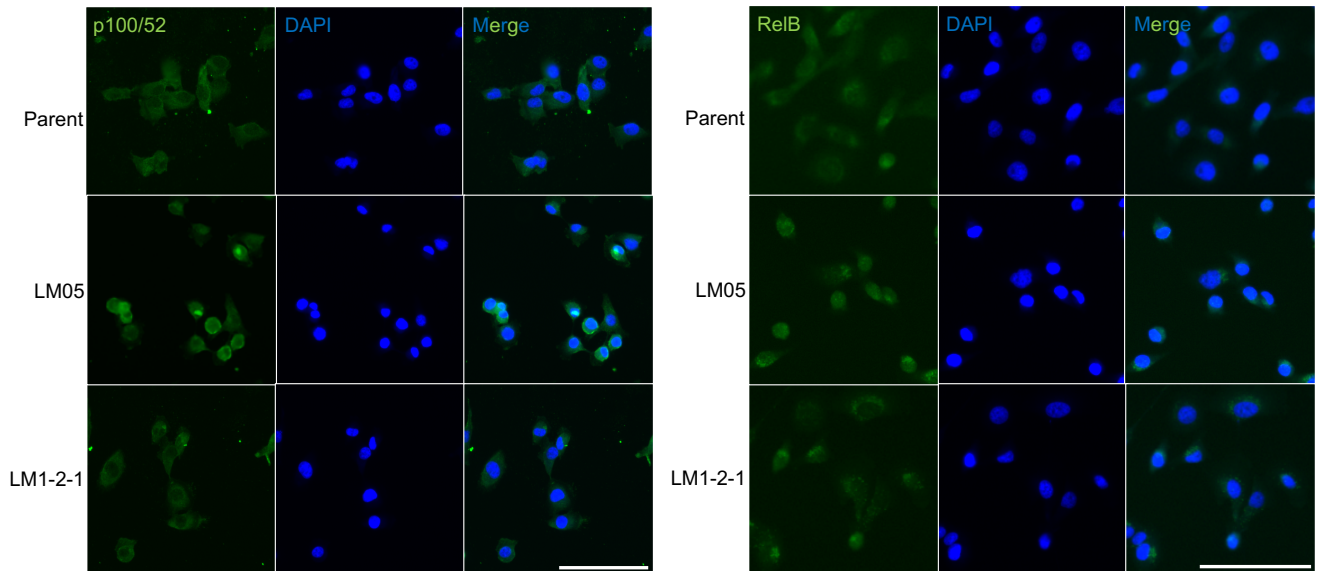

**The validation of the western blotting data by immunofluorescence staining of NF- $\kappa$ B2**

**(p100/52) and RelB.**

Representative immunofluorescence staining images of NF- $\kappa$ B2 (p100/52) and RelB in Parent, LM05, and LM1-2-1 cells. The scale bar is 100  $\mu$ m.

**Figure. S 3.**

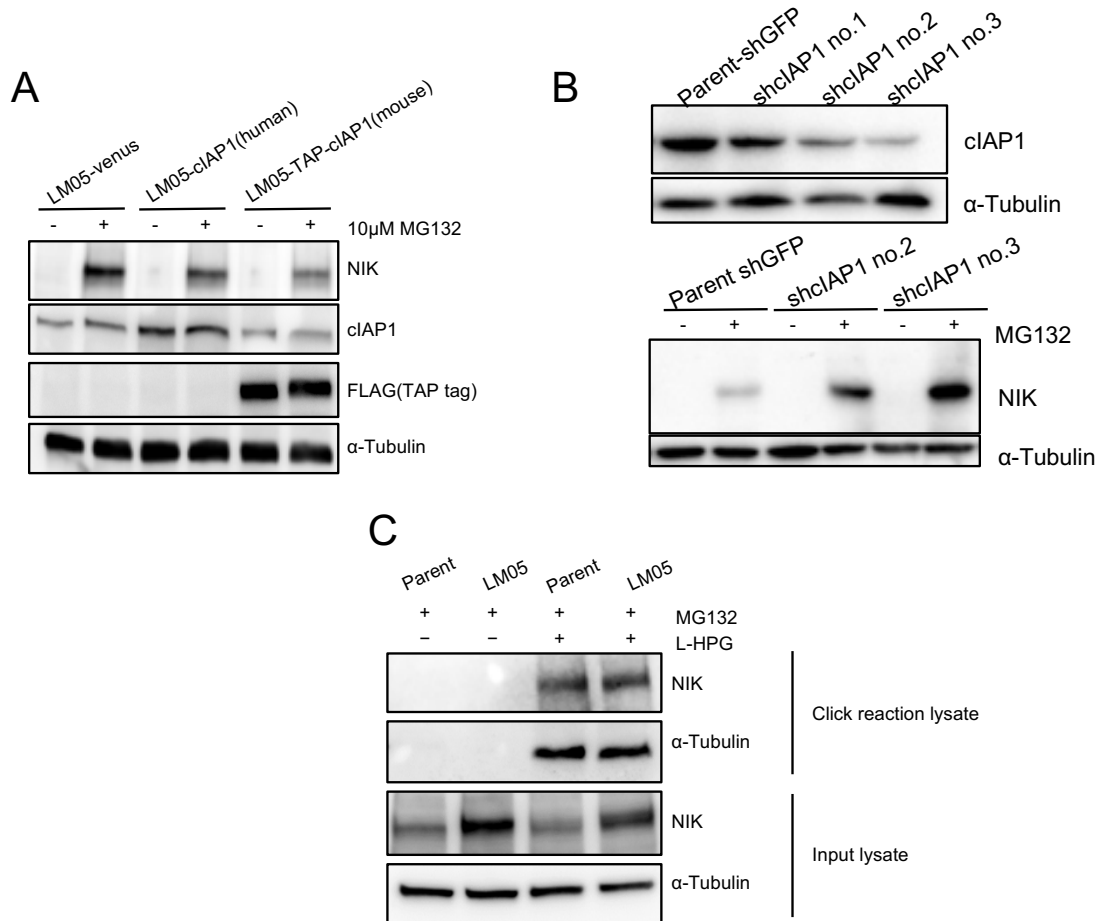

**The alteration of NIK protein production by cIAP1 ectopic expression and knockdown control exhibit negative correlation in LM05 and Parent cells.**

**(A)** Western blotting analysis of NIK protein production in parental, LM05-Venus, LM05-and LM05-cIAP1 (human) and LM05-TAP-cIAP1 (mouse) cells. For western blotting, all cell lines were either untreated or treated with MG132 (10 μM for 4 hr). **(B)** Representative Western blots of cIAP1, NIK and α-Tubulin in control (Parent-shGFP) and cIAP1 knockdown cell lines (Parent-shcIAP1 no.2, 3). For western blotting of NIK, all cell lines were either untreated or treated with MG132 (10 μM for 4 hr). **(C)** Western blotting analysis of nascent NIK protein in parental, LM05 cells. For western blotting, all cell lines were untreated or treated with MG132 (10 μM for 4 hr)

and L-homopropargyl glycine (HPG) (50  $\mu$ M for 4 hr). The nascent proteins labeled with HPG were conjugated to biotin using a click reaction. The biotinylated proteins were purified with streptavidin beads and subjected to western blotting. All data are representative of three independent experiments.

**Figure. S 4.**

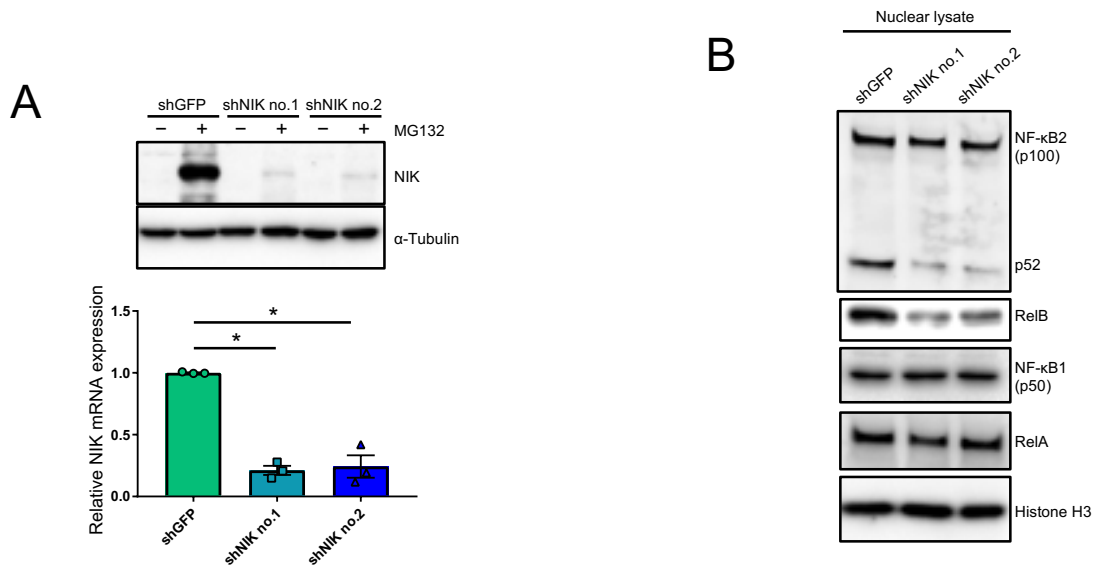

**NIK knockdown cell lines were decreased in NIK expression and nuclear localization of p52 and RelB.**

**(A)** Validation of NIK knockdown efficiency via Western blot (upper) and qRT-PCR (lower, n=3, one-way ANOVA followed by Tukey's multiple comparison test) analyses in LM05-shGFP, shNIK no.1 and shNIK no.2 cells. For western blotting, all cell lines were either untreated or treated with MG132 (10  $\mu$ M for 4 hr). **(B)** Western blotting analysis of NF- $\kappa$ B1 (p50), NF- $\kappa$ B2 (p100/52), RelA and RelB in the nuclear extracts of LM05-shGFP, shNIK no.1 and shNIK no.2 cells. All data are representative of three independent experiments and are shown as the mean $\pm$ SEM. NS, not significant. \* P<0.05.

**Figure. S 5.**

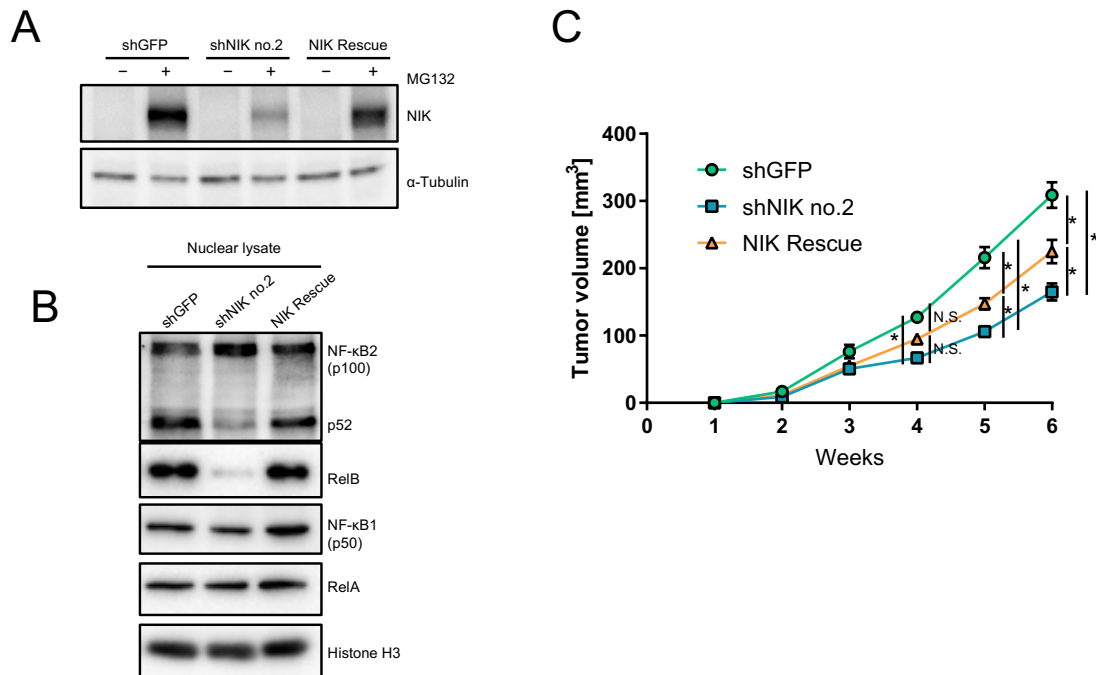

**NIK ectopic expression partially rescued the reduction in tumorigenicity induced by NIK knockdown.**

(A) Validation of the NIK rescue efficiency via Western blot analysis in LM05-shGFP, shNIK no.2 and NIK rescue cells. For western blotting, all cell lines were either untreated or treated with MG132 (10  $\mu$ M for 4 hr). (B) Western blotting analysis of NF- $\kappa$ B1 (p50), NF- $\kappa$ B2 (p100/52), RelA and RelB in the nuclear extracts of LM05-shGFP, shNIK no.2 and NIK rescue cells. (C) Tumor growth curves (two-way ANOVA followed by Tukey’s multiple comparison test) of NOD-SCID mice orthotopically injected with LM05-shGFP (n=6), shNIK no.2 (n=6) and NIK (n=4) rescue cells. All data are representative of three independent experiments and are shown as the mean $\pm$ SEM. NS, not significant. \* P<0.05.

**Figure. S 6.**

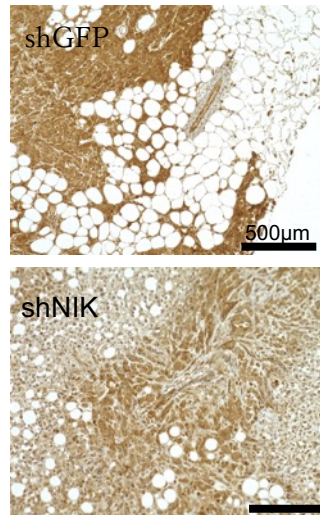

**The anti-NIK antibody is valuable for IHC to detect NIK protein.**

Representative IHC staining images of NIK protein production in primary tumor tissues of orthotopically xenograft model: LM05-shGFP, shNIK cells. The antibody of IHC is the NIK antibody.

**Figure. S 7.**

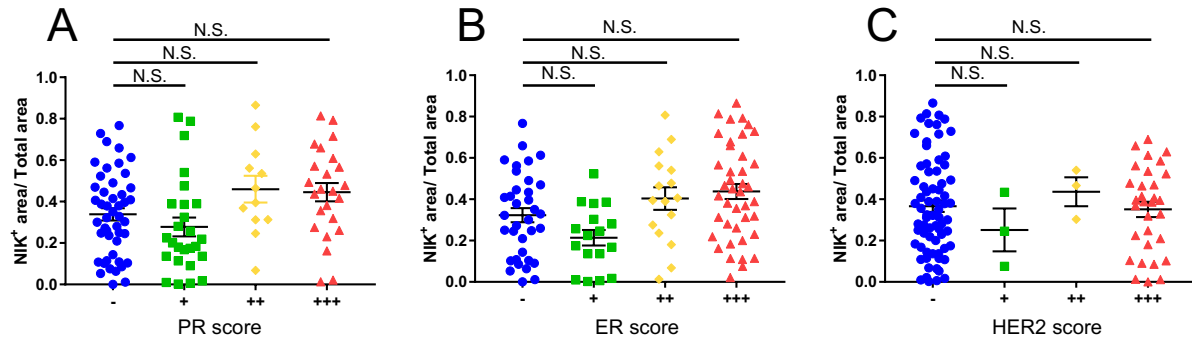

**NIK expression was not correlated with PR, ER, or HER2 scores.**

(A) Quantification data of the NIK IHC staining images of normal breast tissue and breast tumors for each PR score (n=47 - (negative), n=26 +, n=12 ++, and n=24 +++; one-way ANOVA followed by Tukey's multiple comparison test). (B) Quantification data of the NIK IHC staining images of normal breast tissue and breast tumors for each ER score (n=35 - (negative), n=17 +, n=26 ++, and n=41 +++; one-way ANOVA followed by Tukey's multiple comparison test). (C) Quantification data of the NIK IHC staining images of normal breast tissue and breast tumor for each HER2 score (n=72 - (negative), n=3 +, n=3 ++, and n=31 +++; one-way ANOVA followed by Tukey's multiple comparison test).



**Figure. S 8.**

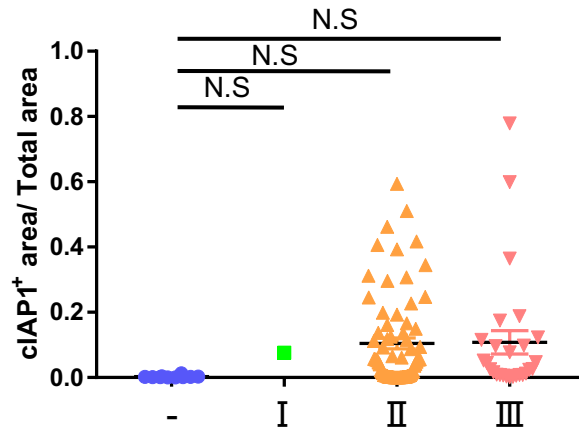

**cIAP1 protein level didn't differ significantly between normal and tumor tissue.**

Quantification data of the cIAP1 IHC staining images in normal breast tissue and breast tumors ((n=10 normal, n=1 stage I, n=72 stage II, and n=27 stage III); one-way ANOVA followed by Tukey's multiple comparison test).

Figure. S 9.

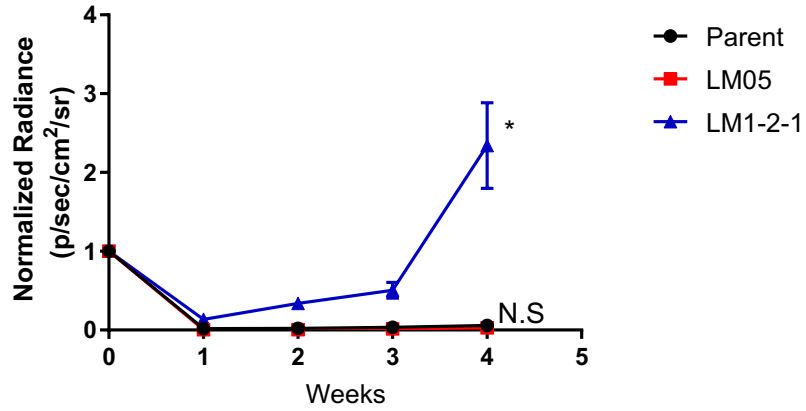

The TVI model showed that the lung metastatic potential of LM05 cells was not enhanced compared with parental cells.

Representative *in vivo* bioluminescent images (left) and quantification data of lung metastases (right) (one-way ANOVA followed by Tukey's multiple comparison test) derived from NOD-SCID mouse tail vein injection with parental, LM05, or LM1-2-1 cells (n=5).

**Figure. S 10.**

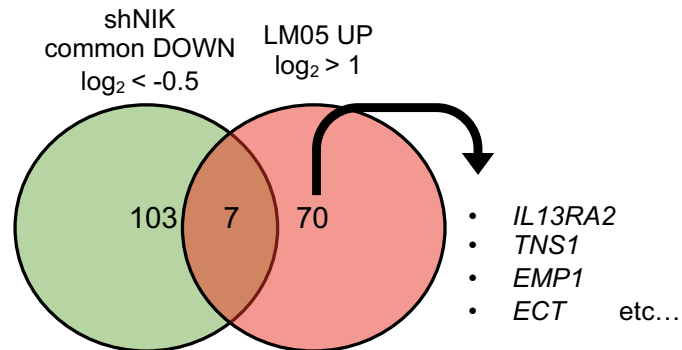

**Some known lung metastasis-promoting genes are highly expressed in the LM05 cell line independent of NIK knockdown.**

Venn diagram of the upregulated genes in LM05 cells based on previous microarray expression data and the downregulated genes found in the NIK KD cell line based on the RNA-seq data from this study. Expression of the known metastasis-promoting genes *IL13RA2*, *TNS1*, and *EMP1* is independent of NIK knockdown.
